# Supplementary material for: Where to Dig for Fossils: Combining Climate-Envelope, Taphonomy and Discovery Models
Source: PubMed Central journal article supplement (PMC4814095; doi:10.1371/journal.pone.0151090), 2016-03-30

**a***Diprotodon*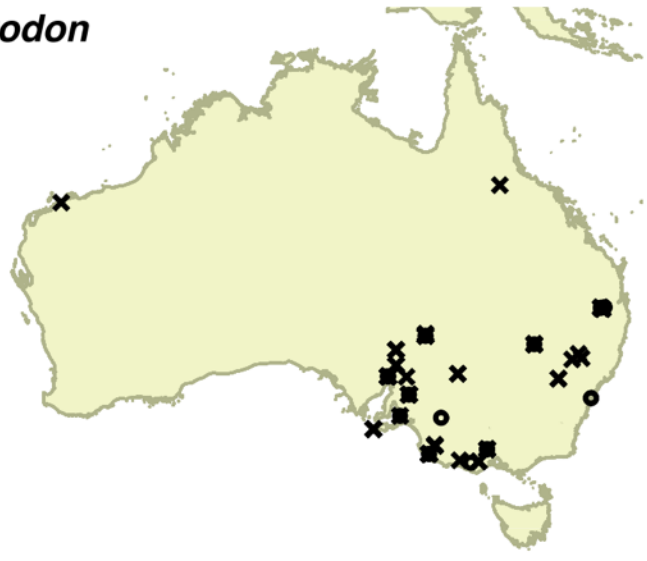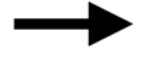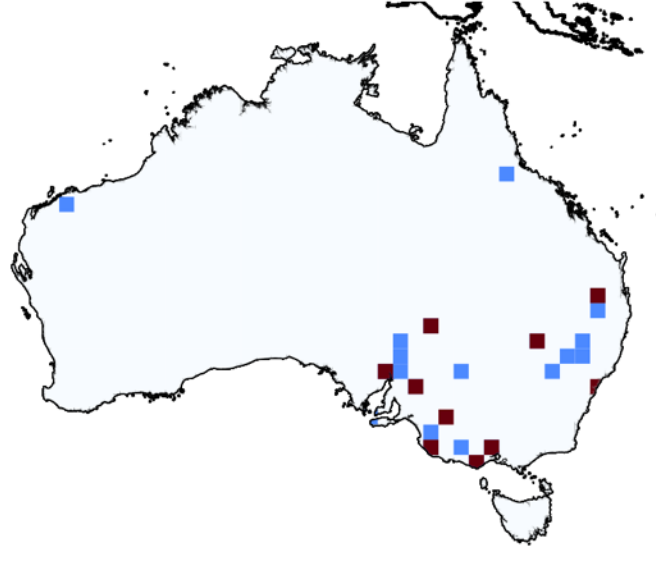*Zygomaturus*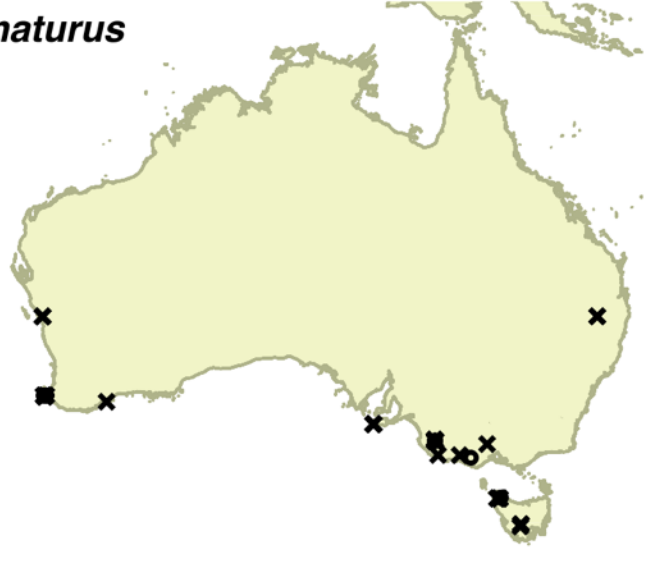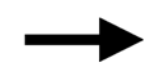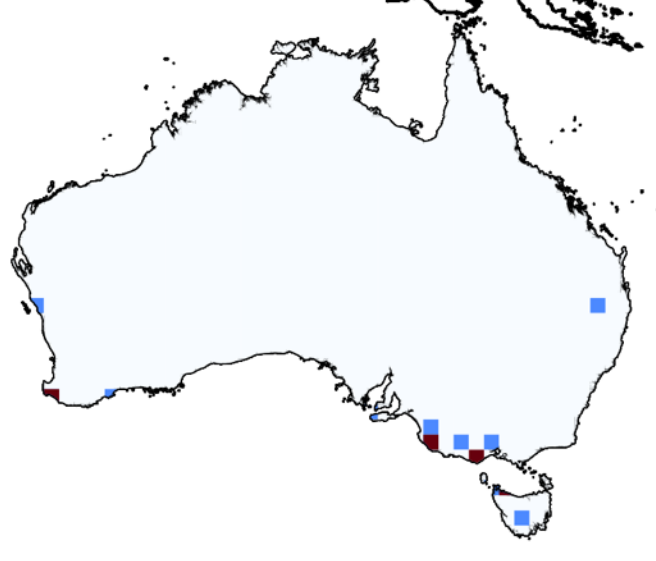*Protemnodon*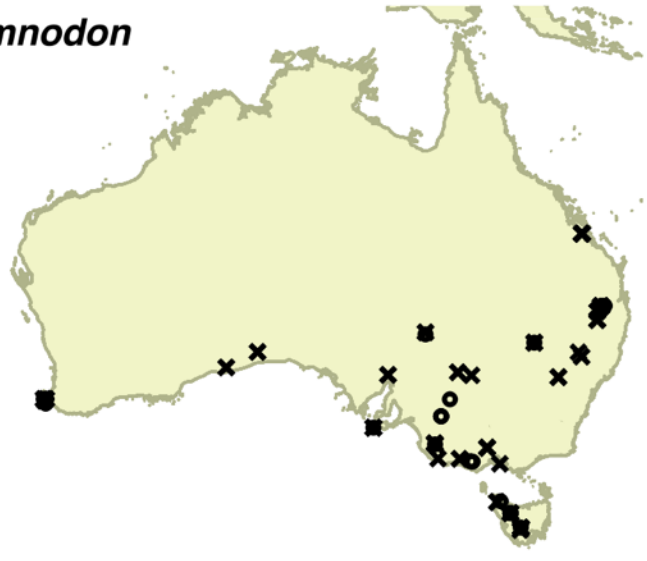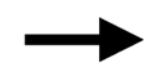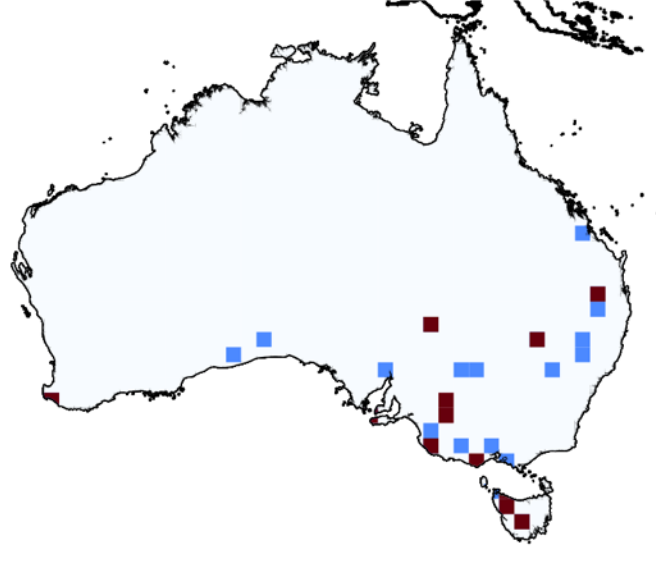*Thylacoleo*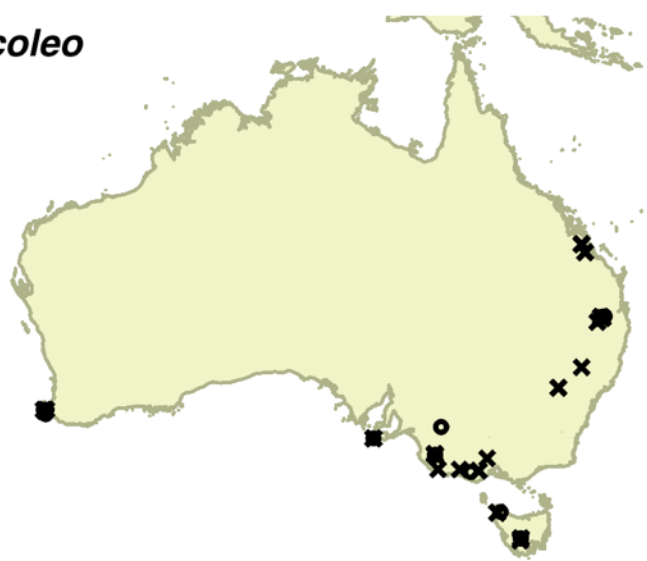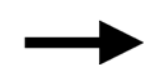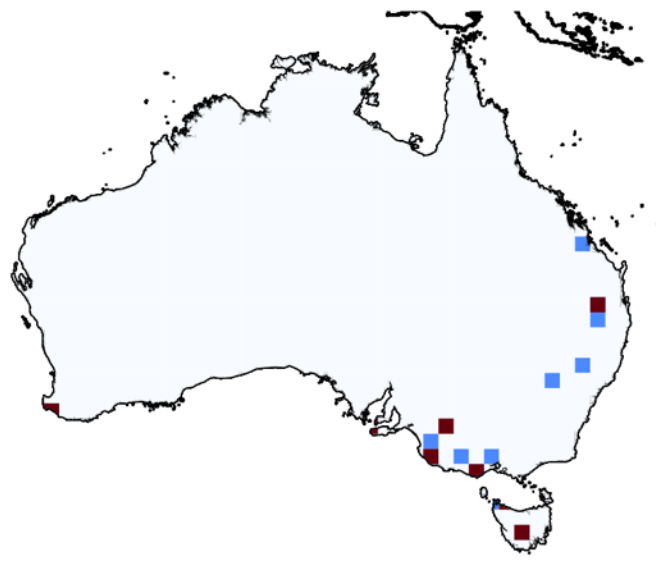*Genyornis*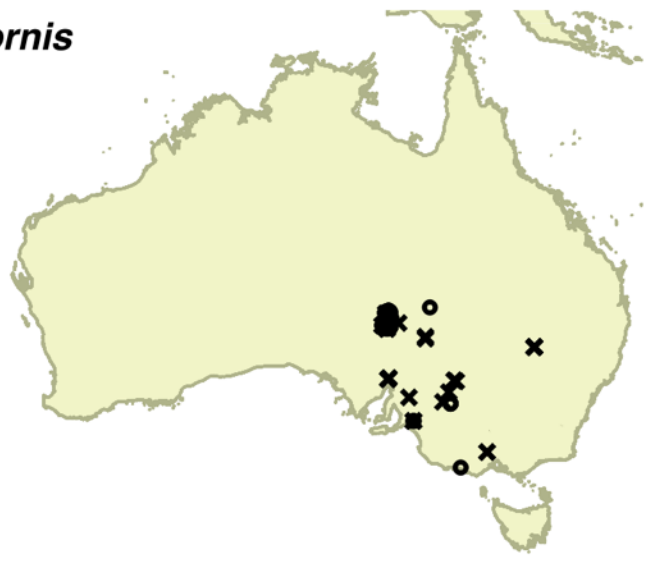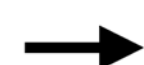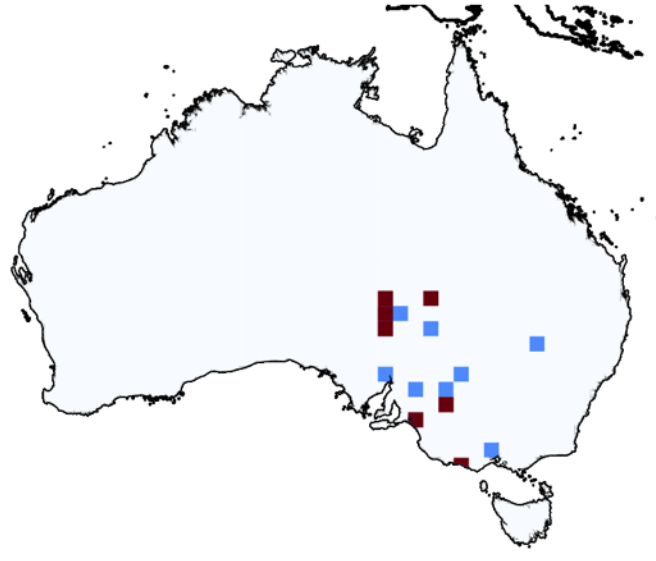

**b**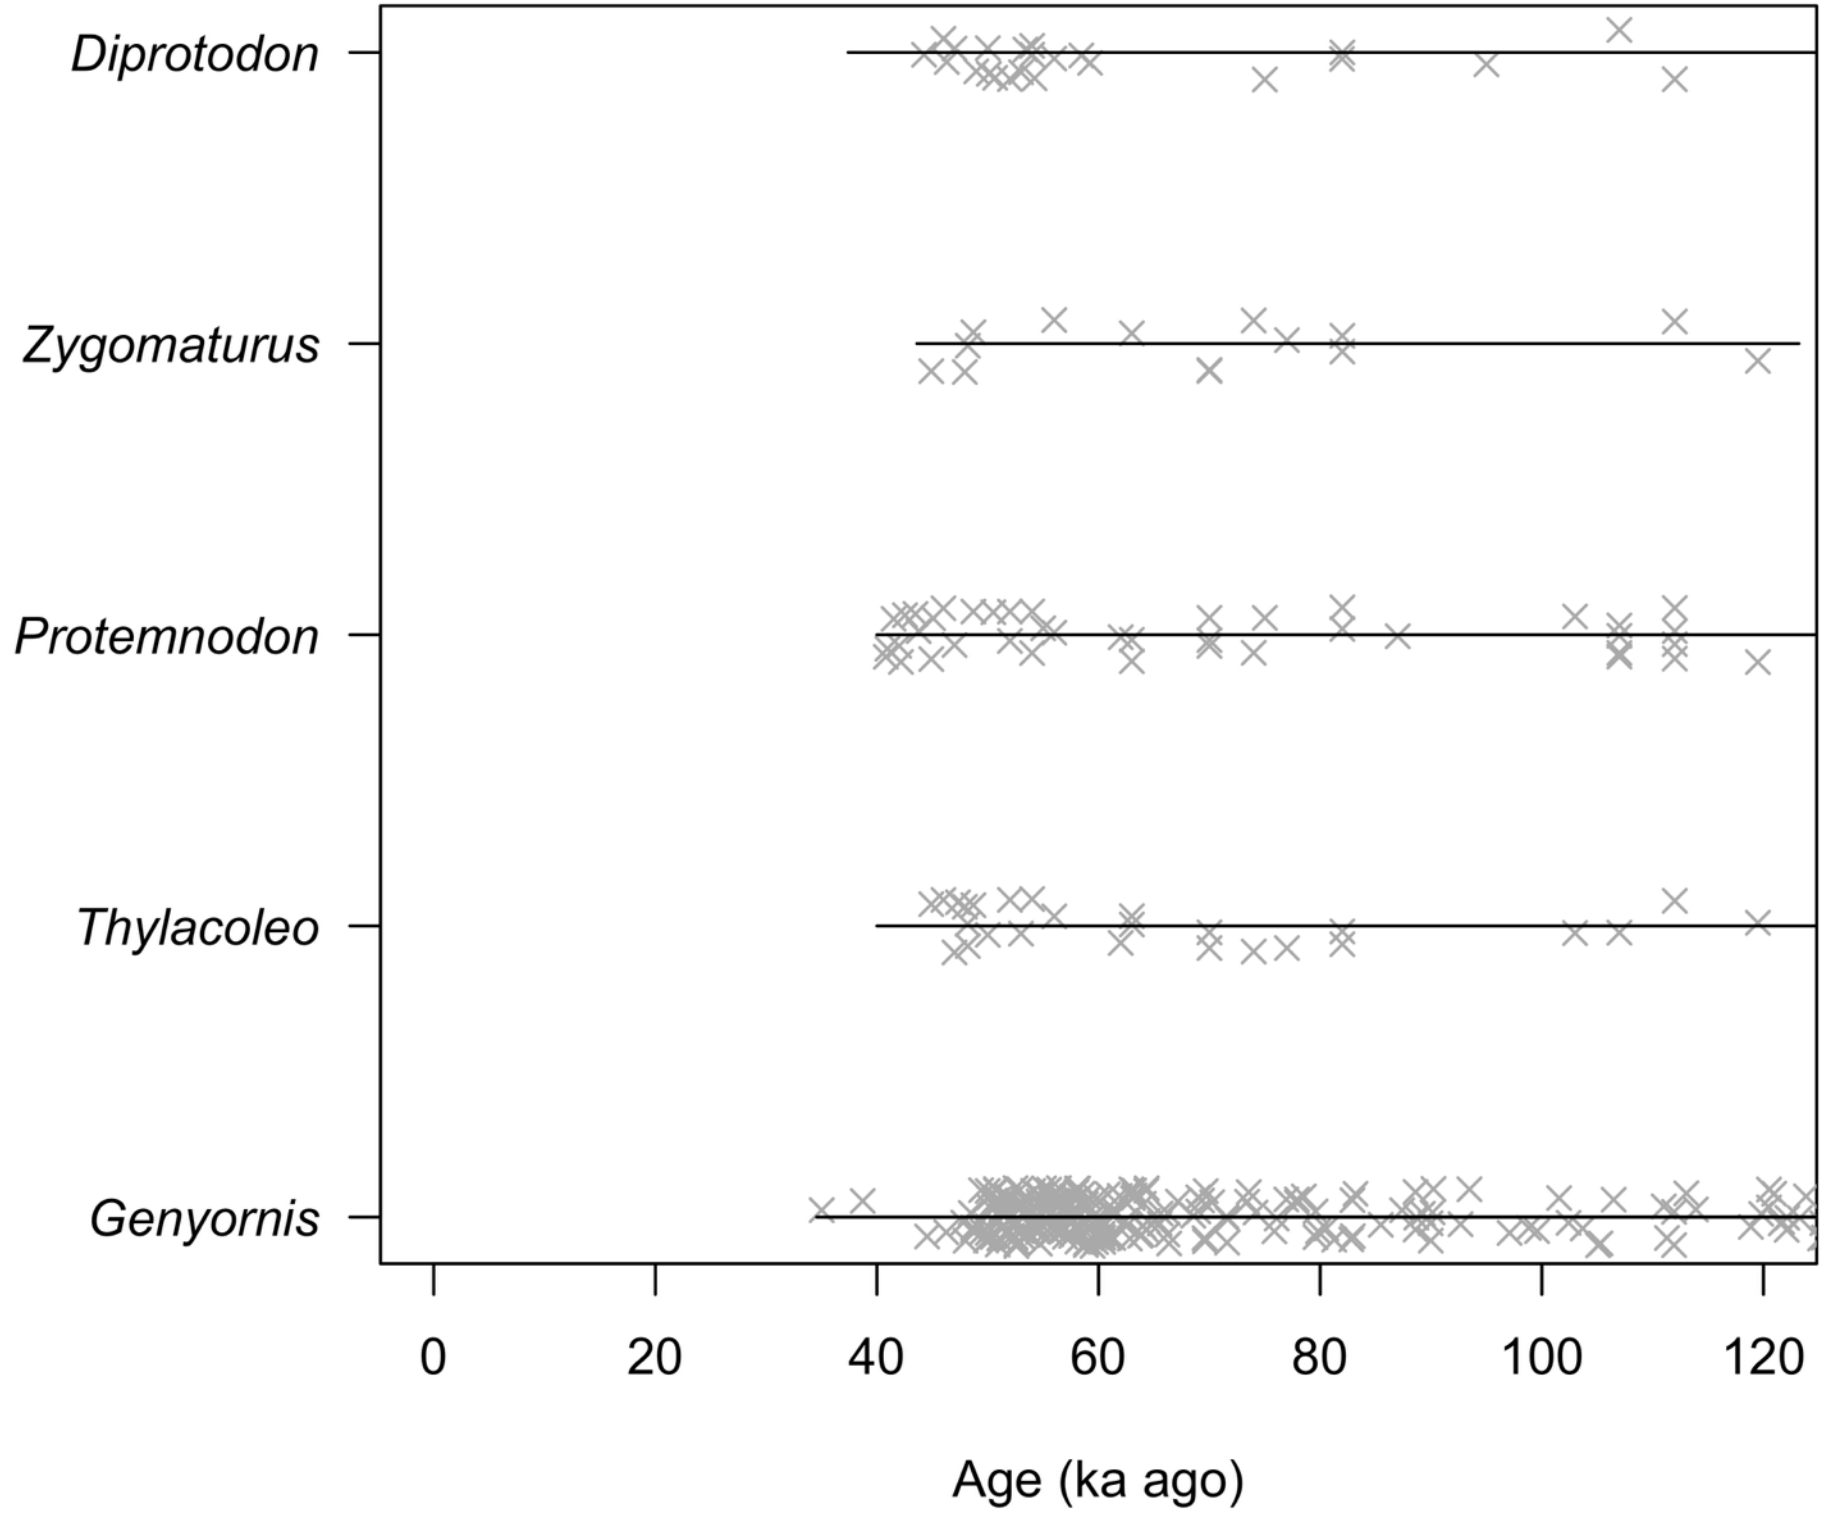

Supplement: pone.0151090.s002.pdf [file pone.0151090.s002.pdf]
