# Supplementary material for: Where to Dig for Fossils: Combining Climate-Envelope, Taphonomy and Discovery Models
Source: PubMed Central journal article supplement (PMC4814095; doi:10.1371/journal.pone.0151090), 2016-03-30

## Slope

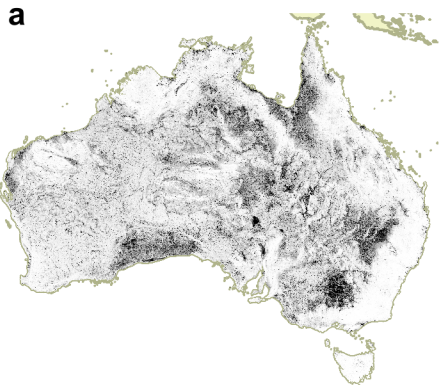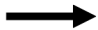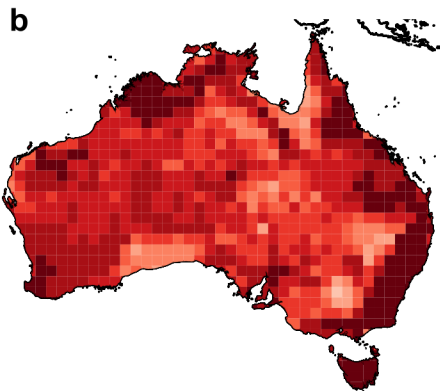

## Bare soil

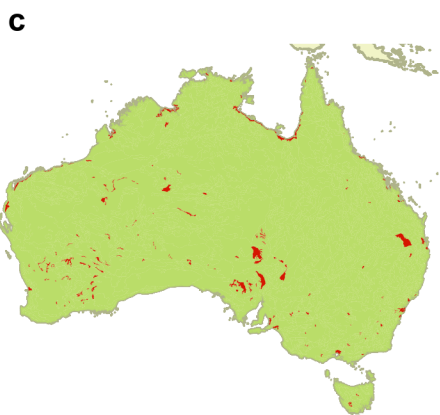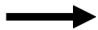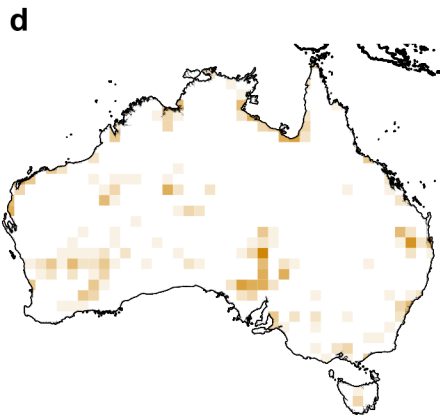

## Rain intensity

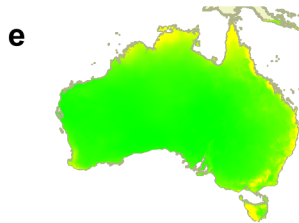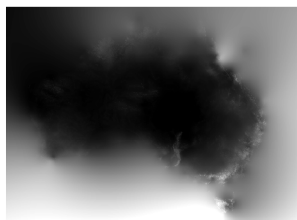

Annual rainfall

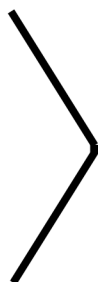

Annual days of rain

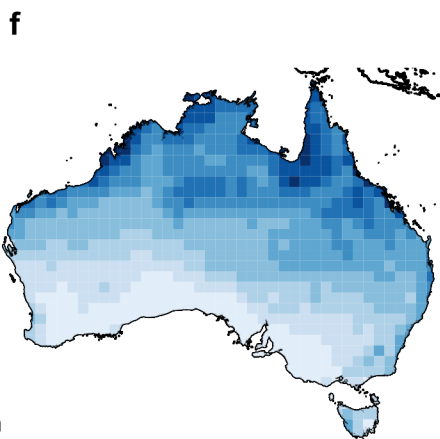

Supplement: pone.0151090.s005.pdf [file pone.0151090.s005.pdf]
