# Supplementary material for: Where to Dig for Fossils: Combining Climate-Envelope, Taphonomy and Discovery Models
Source: PubMed Central journal article supplement (PMC4814095; doi:10.1371/journal.pone.0151090), 2016-03-30
Supplement: pone.0151090.s007.pdf [file pone.0151090.s007.pdf]

*Diprotodon*

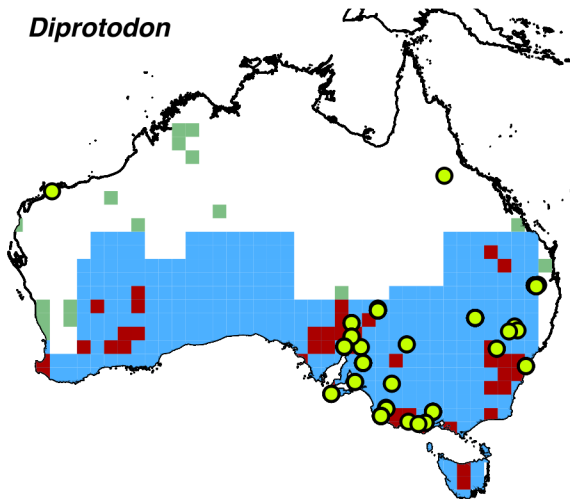

*Zygomaturus*

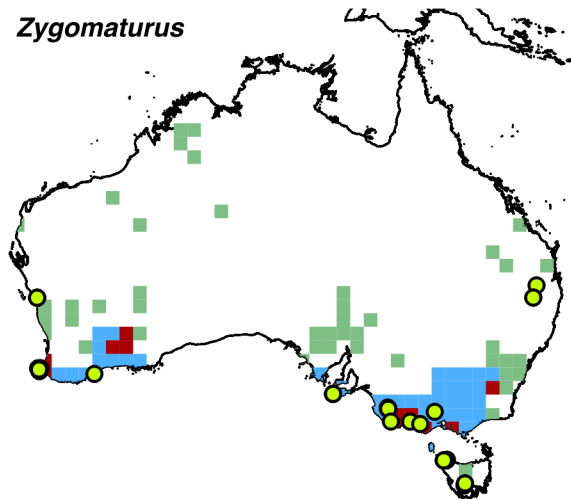

*Protemnodon*

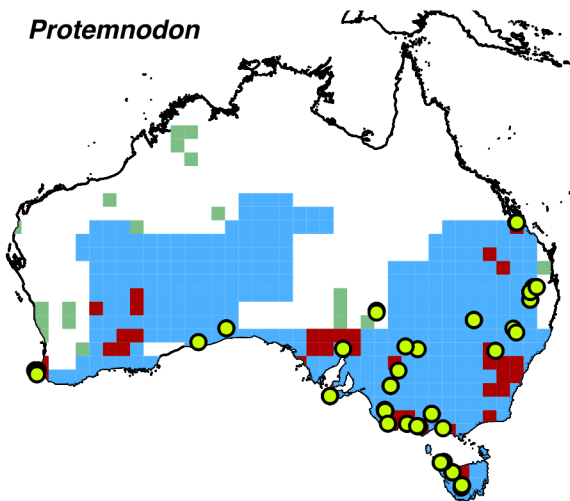

*Thylacoleo*

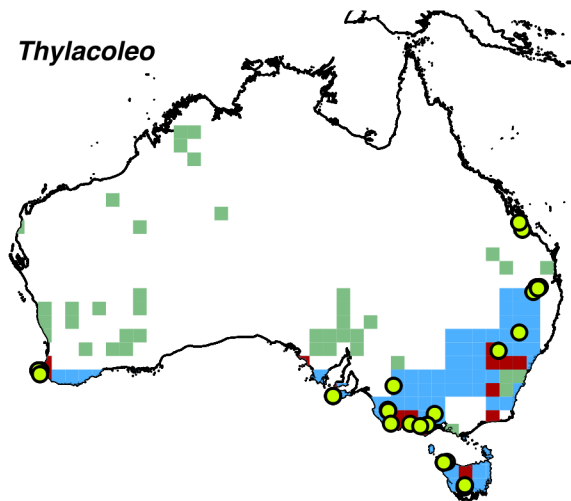

*Genyornis*

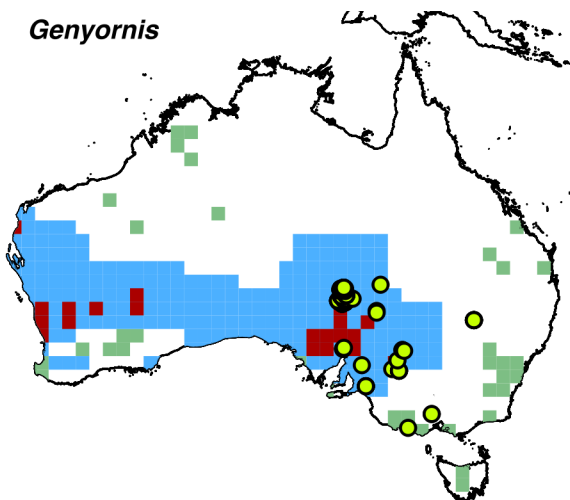

■ All combined

■ Preservation & Discovery

■ Climate Envelope

● Fossil sites
