# Supplementary material for: Where to Dig for Fossils: Combining Climate-Envelope, Taphonomy and Discovery Models
Source: PubMed Central journal article supplement (PMC4814095; doi:10.1371/journal.pone.0151090), 2016-03-30
Supplement: pone.0151090.s009.pdf [file pone.0151090.s009.pdf]

**S1 Table. Generalised linear models ranked by information criterion.**

| Model                     | <i>k</i> | <i>LL</i> | $\Delta$ BIC | wBIC  | % DE |
|---------------------------|----------|-----------|--------------|-------|------|
| $\sim D1M + P$            | 3        | -288.5    | 0.00         | 0.207 | 8.04 |
| $\sim D1M + P + D50K$     | 4        | -285.2    | 0.07         | 0.199 | 9.10 |
| $\sim P + D50K$           | 3        | -289.2    | 1.39         | 0.103 | 7.82 |
| $\sim D1M + D50K$         | 3        | -289.4    | 1.73         | 0.087 | 7.76 |
| $\sim R + D50K$           | 3        | -289.6    | 2.09         | 0.073 | 7.70 |
| $\sim D1M + P + R$        | 4        | -286.3    | 2.21         | 0.068 | 8.76 |
| $\sim D1M + R$            | 3        | -289.7    | 2.32         | 0.065 | 7.67 |
| $\sim P + R + D50K$       | 4        | -286.4    | 2.49         | 0.060 | 8.72 |
| $\sim D1M + R + D50K$     | 4        | -286.5    | 2.72         | 0.053 | 8.68 |
| $\sim D1M$                | 2        | -293.7    | 3.62         | 0.034 | 6.39 |
| $\sim D1M + P + R + D50K$ | 5        | -283.6    | 3.67         | 0.033 | 9.60 |
| $\sim D50K$               | 2        | -294.4    | 4.93         | 0.018 | 6.18 |
| $\sim P + R$              | 3        | -294.7    | 12.36        | 0.00  | 6.07 |
| $\sim R$                  | 2        | -299.5    | 15.27        | 0.00  | 4.53 |
| $\sim P$                  | 2        | -303.2    | 22.61        | 0.00  | 3.36 |

Sensitivity analysis examining the relative influence of four sampling-bias related parameters on the presence of fossils. The 15 generalised linear models (logistic regressions) are ranked by their Bayesian information criterion weights (wBIC). Also shown are the number of model parameters (*k*), the minimum negative log-likelihood (*LL*), the difference between a model's Bayesian information criterion (BIC) and that of the top-ranked model ( $\Delta$ BIC), and the percentage of deviance explained (% DE).

Parameters: *D1M* = Distance from centre of a grid cell to the centre of the closest city with > one million inhabitants; *P* = Total population per grid cell; *R* = Total length of roads per grid cell; *D50K* = Distance from center of a grid cell to the centre of the closest city with > 50 thousand inhabitants.
