# Supplementary material for: Where to Dig for Fossils: Combining Climate-Envelope, Taphonomy and Discovery Models
Source: PubMed Central journal article supplement (PMC4814095; doi:10.1371/journal.pone.0151090), 2016-03-30
Supplement: pone.0151090.s010.pdf [file pone.0151090.s010.pdf]

**S2 Table. Summary of fossil preservation model.** Estimated coefficients of logistic regression of fossil occurrence as a function of presence of caves, area of lakes, and area of suitable rocks for fossil preservation.

| Variable           | Estimate | Standard error | Z value | P value |
|--------------------|----------|----------------|---------|---------|
| (Intercept)        | -4.26    | 1.02           | -4.19   | < 0.001 |
| Cave presence      | 1.28     | 0.25           | 5.04    | < 0.001 |
| Lake area          | 0.05     | 0.02           | 2.40    | 0.017   |
| Suitable rock area | 2.08     | 1.05           | 1.99    | 0.047   |
