# Supplementary material for: Where to Dig for Fossils: Combining Climate-Envelope, Taphonomy and Discovery Models
Source: PubMed Central journal article supplement (PMC4814095; doi:10.1371/journal.pone.0151090), 2016-03-30
Supplement: pone.0151090.s011.pdf [file pone.0151090.s011.pdf]

**S3 Table. Summary of fossil discovery model.** Estimated coefficients of logistic regression of fossil occurrence as a function of the area of bare soil, mean rain intensity, and mean slope.

| Variable        | Estimate | Standard error | Z value | P value |
|-----------------|----------|----------------|---------|---------|
| (Intercept)     | -11.19   | 1.96           | -5.70   | < 0.001 |
| Bare soil       | 0.07     | 0.02           | 4.40    | < 0.001 |
| Rain intensity* | -19.27   | 0.03           | -7.34   | < 0.001 |
| Slope           | 0.11     | 0.02           | 4.63    | < 0.001 |

\* Estimated as the mean total annual rainfall divided by the average annual days of rain. Data from the Australian Government's Bureau of Meteorology – [www.bom.gov.au](http://www.bom.gov.au)
