# Supplementary material for: Where to Dig for Fossils: Combining Climate-Envelope, Taphonomy and Discovery Models
Source: PubMed Central journal article supplement (PMC4814095; doi:10.1371/journal.pone.0151090), 2016-03-30
Supplement: pone.0151090.s012.pdf [file pone.0151090.s012.pdf]

**S4 Table. Validation results for the predictions of the single climate envelope, preservation, and discovery models, as well as their combined predictions.** We compared the suitability values predicted for grid cells containing fossils with unreliable ages of a given genus (not used to train the models) with the suitability values predicted for 1000 sets of randomly selected grid cells from across Australia using a Kolmogorov-Smirnov test.

| Taxon              | Prediction               | Median Kolmogorov-Smirnov statistic<br>(1 <sup>st</sup> – 3 <sup>rd</sup> quartiles) |
|--------------------|--------------------------|--------------------------------------------------------------------------------------|
| <i>Diprotodon</i>  | Palaeo-climate           | 0.43 (0.36 – 0.57)                                                                   |
|                    | Preservation             | 0.29 (0.29 – 0.36)                                                                   |
|                    | Discovery                | 0.57 (0.50 – 0.64)                                                                   |
|                    | Discovery & Preservation | 0.50 (0.43 – 0.57)                                                                   |
|                    | All combined             | 0.50 (0.43 – 0.64)                                                                   |
| <i>Zygomaturus</i> | Palaeo-climate           | 0.67 (0.56 – 0.67)                                                                   |
|                    | Preservation             | 0.33 (0.22 – 0.33)                                                                   |
|                    | Discovery                | 0.78 (0.67 – 0.78)                                                                   |
|                    | Discovery & Preservation | 0.56 (0.44 – 0.67)                                                                   |
|                    | All combined             | 0.67 (0.56 – 0.78)                                                                   |
| <i>Protemnodon</i> | Palaeo-climate           | 0.60 (0.53 – 0.67)                                                                   |
|                    | Preservation             | 0.33 (0.27 – 0.40)                                                                   |
|                    | Discovery                | 0.40 (0.33 – 0.47)                                                                   |
|                    | Discovery & Preservation | 0.53 (0.46 – 0.67)                                                                   |
|                    | All combined             | 0.60 (0.53 – 0.67)                                                                   |
| <i>Thylacoleo</i>  | Palaeo-climate           | 0.75 (0.75 – 0.88)                                                                   |
|                    | Preservation             | 0.38 (0.25 – 0.38)                                                                   |
|                    | Discovery                | 0.63 (0.50 – 0.75)                                                                   |
|                    | Discovery & Preservation | 0.50 (0.38 – 0.63)                                                                   |

|                  |                          |                    |
|------------------|--------------------------|--------------------|
|                  | All combined             | 0.88 (0.75 – 0.88) |
| <i>Genyornis</i> | Palaeo-climate           | 0.63 (0.50 – 0.63) |
|                  | Preservation             | 0.38 (0.38 – 0.50) |
|                  | Discovery                | 0.25 (0.13 – 0.38) |
|                  | Discovery & Preservation | 0.48 (0.20 – 0.87) |
|                  | All combined             | 0.63 (0.50 – 0.63) |
|                  |                          |                    |
